# Supplementary material for: Magnaporthe oryzae Transcription Factor MoBZIP3 Regulates Appressorium Turgor Pressure Formation during Pathogenesis
Source: MDPI journal article supplement (doi:10.3390/ijms23020881), 2022-01-14
Supplement: s1 [file s1]

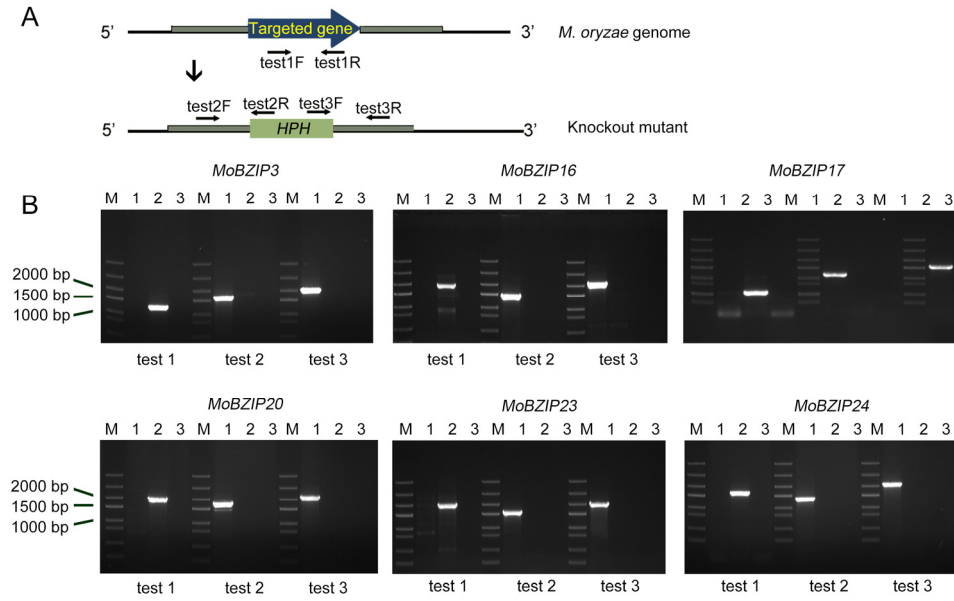

**Figure S1.** Targeted gene deletion in *M. oryzae*

A, Schematic illustration of the gene deletion of *bZIP* genes in *M. oryzae*. (b) PCR analysis of the *bZIP* gene deletion mutants with the indicated four primer pairs. Lanes 1, 2, and 3 indicate the WT, the mutant and the mock control.

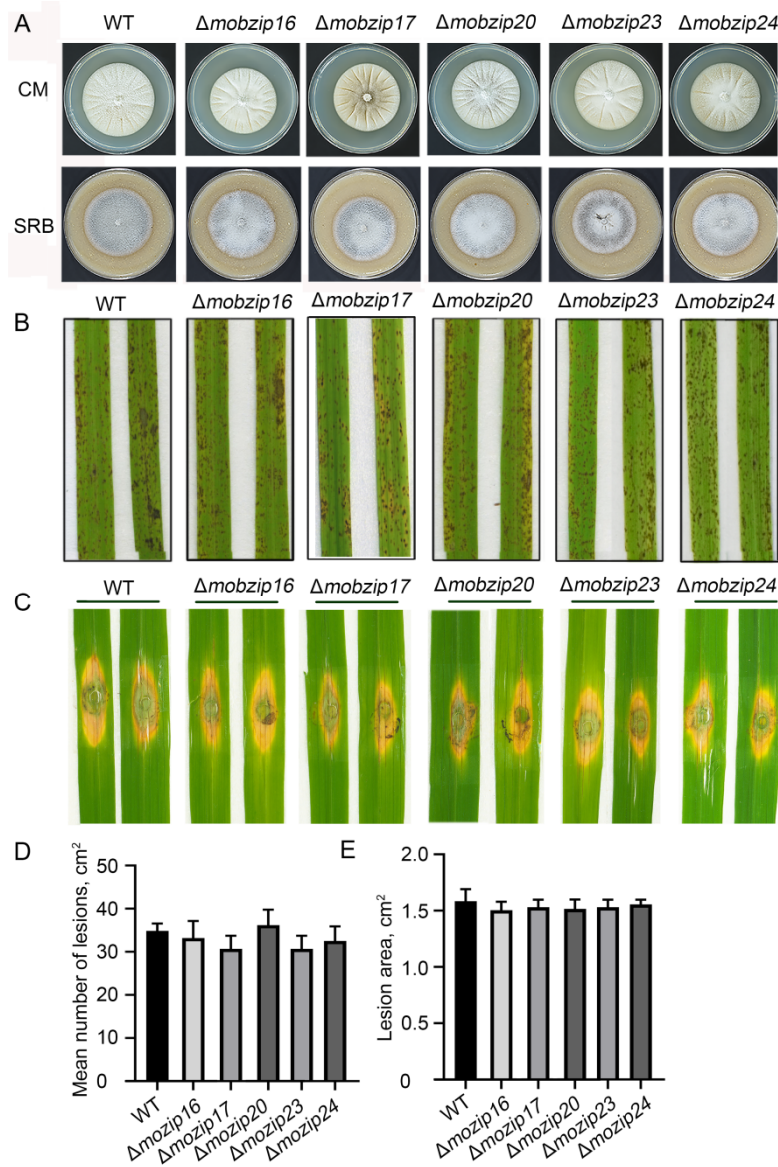

**Figure S2.** Pathogenesis analysis of mutants of *bZIP* genes

A, Same numbers of conidia of WT and *bZIP* gene mutants ( $\Delta mobzip16$ ,  $\Delta mobzip17$ ,  $\Delta mobzip20$ ,  $\Delta mobzip23$  and  $\Delta mobzip24$ ) were cultured on the completed mediate (CM) and straw rice bran (SRB) medium. Images showing seven-day-old cultures of the indicated *M. oryzae* on the two types of mediums. B and C, Pathogenesis analysis of these indicated *M. oryzae* using conidia spraying (B) or punched (C) inoculated methods to infect rice leaves (*O. sativa* cv. Nipponbare). Images were obtained from 5 days after inoculation. The experiments were repeated three times with similar results. D and E, Quantification of the lesion numbers (D) and area (E) of the rice leaves

shown in (B) and (C), respectively. Error bars represent SD (n = 20).

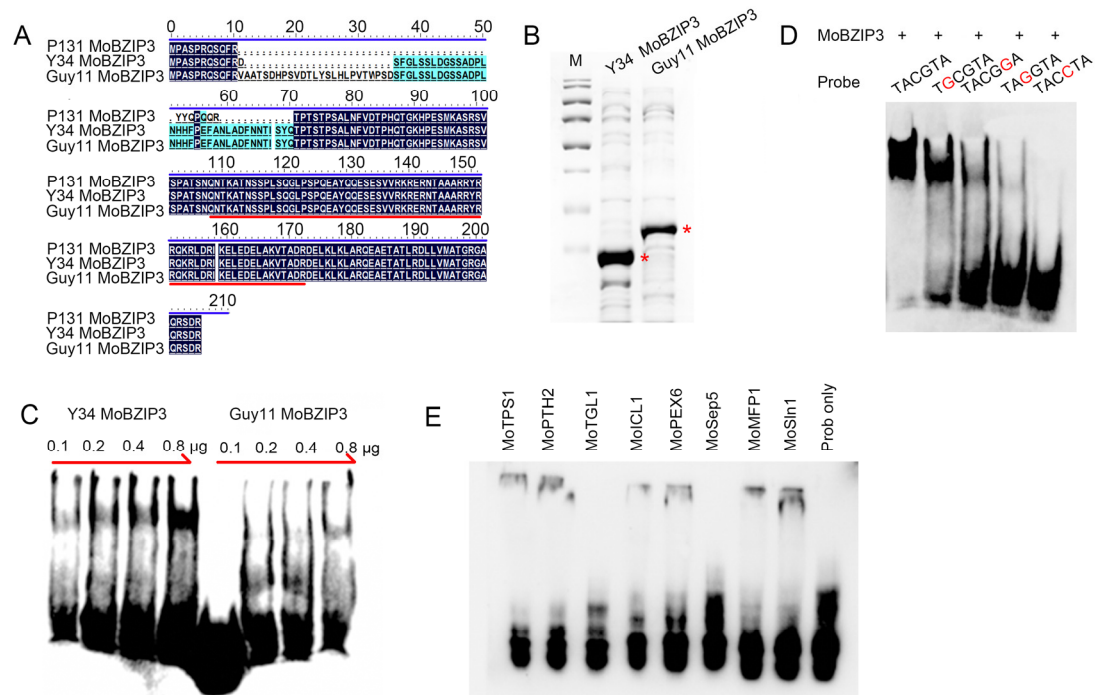

**Figure S3.** Biochemical analysis of MoBZIP3

A, Amino acids of MoBZIP3 of *M. oryzae* strain P131, Y34 and Guy11. The amino acids highlighted with a red line indicate the conserved basic region leucine zipper domain; B, *In vitro* expressed MoBZIP3 from Y34 and Guy11; C, EMSA showing the DNA binding activity of MoBZIP3 from Y34 and Guy11. Increasing amount of Y34 and Guy11 MoBZIP3 proteins were incubated with Bio-A-box; D, Y34 MoBZIP3 binds the A-box or the mutants of A-box DNA fragments, the red bases indicate the site mutations of the DNA fragments; E, Y34 MoBZIP3 binding promoters of *MoTPS1*, *MoPTH2*, *MoTGL1*, *MoICL1*, *MoPEX6*, *MoSep5*, *MoMFP1* and *MoSln1*. Promoters of *MoTPS1*, *MoPTH2*, *MoICL1*, *MoPEX6*, *MoMFP1* and *MoSln1* contain an A-box.

**Table S1.** Primers used in this study.

The nucleotides highlighted in red indicate the enzyme site for construction.

|                                  |                                                      |
|----------------------------------|------------------------------------------------------|
| MoBZIP3-ORF-F                    | ATGCCGGCCTCACCAAGACAG                                |
| MoBZIP3-ORF-R                    | CTACCTATCAGAACGTTGCGC                                |
| pKNTG-MoBZIP3- GFP-F             | CGACGGCCAGTGCC <b>AAGCTT</b> ACTTACATATCGCCGCCTC     |
| pKNTG-MoBZIP3-GFP-R              | GCCCTTGCTCACCAT <b>CCCGGG</b> CCTATCAGAACGTTGCGC     |
| MoBZIP3-KO-HPT-5'F               | GGTGGCGGCCGC <b>TCTAGA</b> ACTTACATATCGCCGCCTC       |
| MoBZIP3-KO-HPT-5'R               | CAAAAATGCTCCTTCAAT <b>TCTAGA</b> GGCACTCAGACAGGGTA   |
| MoBZIP3-KO-HPT-3'F               | GGGTTCGCAAAGATAA <b>AAGCTT</b> AGGTGGGATCCGATAGAT    |
| MoBZIP3-KO-HPT-3'R               | GGTCGACGGTATCGAT <b>AAGCTT</b> CGATGATATTGCACAACG    |
| MoBZIP3-PET-28a-F                | GACAGCAAATGGGTCGC <b>GGATCC</b> ATGCCGGCCTCACCAAG    |
| MoBZIP3-PET-28a-R                | GCTCGAGTGCGGCCGC <b>AAGCTT</b> CTACCTATCAGAACGTTG    |
| $\Delta$ <i>mobzip3</i> -test-1  | CGTTAAGCGA TATGTCGATG C                              |
| $\Delta$ <i>mobzip3</i> -test-2  | CATCTCAACGCTCTATTTCGC                                |
| $\Delta$ <i>mobzip3</i> -test-3  | ATGCTCGCAAGGAGGGGTC                                  |
| $\Delta$ <i>mobzip3</i> -test-4  | TCAGATGTGGCCATAGCTCG                                 |
| MoBZIP16-KO-HPT-5'F              | GGTGGCGGCCGC <b>TCTAGAC</b> GTAAAGGCAT CTGTTATGCT C  |
| MoBZIP16-KO-HPT-5'R              | CAAAAATGCTCCTTCAAT <b>TCTAGAT</b> GATGCGACTGGCGATA G |
| MoBZIP16-KO-HPT-3'F              | GGGTTCGCAAAGATAA <b>AAGCTT</b> TGTCGACCTTTTTGGTCC C  |
| MoBZIP16-KO-HPT-3'R              | GGTCGACGGTATCGAT <b>AAGCTT</b> AAGGACACGGAAGCTAAC    |
| $\Delta$ <i>mobzip16</i> -test-1 | CCATCTCATC CAGAGCAACG                                |
| $\Delta$ <i>mobzip16</i> -test-2 | GAGAGATCCATTGACTCAGG                                 |
| $\Delta$ <i>mobzip16</i> -test-3 | ATGAGCAGGAGCACCATCAA                                 |
| $\Delta$ <i>mobzip16</i> -test-4 | CTAAGACATGAAATTCAAAG                                 |
| ELQ40875'                        | ATGAGGACCTC ATCTCGTAGC                               |
| ELQ40875'                        | CATCTAAGATTGAGCAACCC                                 |
| ELQ40875-F                       | ATGACGGGCTCCCGAACAAG                                 |
| ELQ40875-R                       | TCAATTGCCAGATCCAAACC                                 |
| MoBZIP20-KO-HPT-5'F              | GGTGGCGGCCGC <b>TCTAGAA</b> CATTTTCAA TCCGGGGCCATG   |
| MoBZIP20-KO-HPT-5'R              | CAAAAATGCTCCTTCAAT <b>TCTAGAC</b> GGTGGCTCGACAATCG A |
| MoBZIP20-KO-HPT-3'F              | GGGTTCGCAAAGATAA <b>AAGCTT</b> AGTCTGAGTCTGTCTGGG    |
| MoBZIP20-KO-HPT-3'R              | GGTCGACGGTATCGAT <b>AAGCTT</b> TGGTATGTAGCAATTGCAC   |
| $\Delta$ <i>mobzip20</i> -test-1 | TTCTAGTGCA AACCGGACAG                                |
| $\Delta$ <i>mobzip20</i> -test-2 | CAAGGTATTGCCCGAACT                                   |

|                          |                                                |
|--------------------------|------------------------------------------------|
| $\Delta$ mobzip20-test-3 | ATGGCTTCCACATTTCAAAT                           |
| $\Delta$ mobzip20-test-4 | TCATTTCATGTGCGTCGTTGT                          |
| MoBZIP23-KO-HPT-5'F      | GGTGGCGGCCGCTCTAGAGGCCAAGGTA CAGTTCAGTAG       |
| MoBZIP23-KO-HPT-5'R      | CAAAAATGCTCCTTCAATCTAGATGTGAATAGACTTCTAGA      |
| MoBZIP23-KO-HPT-3'F      | GGGTTCGCAAAGATAAAAGCTTACCGAACGATTTATACTC<br>G  |
| MoBZIP23-KO-HPT-3'R      | GGTCGACGGTATCGATAAGCTTCGTATCGGAGTATTTTGGA<br>T |
| $\Delta$ mobzip23-test-1 | CCAACTCTGAAAATAAGCACG                          |
| $\Delta$ mobzip23-test-2 | CGAAGTTCCC TGTGTGATAT G                        |
| $\Delta$ mobzip23-test-3 | ATGTCCATCGACAGAAAAGA                           |
| $\Delta$ mobzip23-test-4 | TCACCTCATGTTGCTTGTGTC                          |
| MoBZIP24-KO-HPT-5'F      | GGTGGCGGCCGCTCTAGATACGACGTGGCGTAGCTTCT         |
| MoBZIP24-KO-HPT-5'R      | CAAAAATGCTCCTTCAATCTAGACTTGTCTGCCATACCTGT      |
| MoBZIP24-KO-HPT-3'F      | GGGTTCGCAAAGATAAAAGCTTTACCTCGGCCACTTCAAA       |
| MoBZIP24-KO-HPT-3'R      | GGTCGACGGTATCGATAAGCTTGGAGCATTGACTTCAATCT      |
| pKNTG-PTS1-GFP-F         | CGACGGCCAGTGCCAGCTTATATGCCTTAACCG ACCTC        |
| pKNTG-PTS1-GFP-R         | GCCCTTGCTCACCATCCCGGCGAGCTTCGACATTGTGATG<br>A  |
| pKNTG-MoSLN1-GFP-F       | CGACGGCCAGTGCCAGCTTT GAATGTTGTT<br>CCGCCACCT   |
| pKNTG-MoSLN1-GFP-R       | GCCCTTGCTCACCATCCCGGCGTCGCCACAGCAGCACCG        |
| pKNTG-MoSEP5-GFP-F       | CGACGGCCAGTGCCAGCTTGTTGGAAAGCCGAAATGTC         |
| pKNTG-MoSEP5-GFP-R       | GCCCTTGCTCACCATCCCGGG GTTGCCGTCT TCCCCGTTT     |

Primers used for quantitative RT-PCR

|               |                        |
|---------------|------------------------|
| MoActin-F     | AG TCCAGGTTAT CACTCACA |
| MoActin-R     | GATTCCAGGTCCATATTCTTGG |
| RT- MoBZIP3-F | CGACAAACTCATCTCCCTT    |
| RT- MoBZIP3-R | GACCAACAAATCCCTCAG     |
| ELQ41552.1-F  | ACCAGTCCCTGCCGTTCT     |
| ELQ41552.1-R  | GAGCTCGACCAGCTGCGCAG   |
| ELQ40875.1-F  | GCTGACACATACAAGACGCT   |
| ELQ40875.1-R  | CAAACCTGACATCAAACCC    |
| ELQ34378.1-F  | GCAACGACCTTCTCAGTCA    |
| ELQ34378.1-R  | GCATACAGCCCAATGTCA     |
| ELQ33489.1-F  | ATCGCATCTCGGAACTTG     |
| ELQ33489.1-R  | AACAACCTTCTCACAGCAGCA  |
| ELQ44526.1-F  | AAGAAGGCTAAATGCTCTGG   |
| ELQ44526.1-R  | CTTGATGAACCAAATCCCAC   |
| ELQ34568.1-F  | GCTCGTTGATGCTGCTGAT    |
| ELQ34568.1-R  | TGTCTTTCGTGGTGCGTCT    |
| ELQ42748.1-F  | ATTCCTCGGGATGTGGTCA    |

|              |                        |
|--------------|------------------------|
| ELQ42748.1-R | GCATAACAAGCCAGATTCAACC |
| ELQ42426.1-F | CTGTGTCCTCAGCCTCTACA   |
| ELQ42426.1-R | TTTATGGGTCCGACTTCG     |
| ELQ37252.1-F | TGATGGAGGAGTTCGAGGCT   |
| ELQ37252.1-R | CAGGGACCTCATGCTTGGA    |
| ELQ32319.1-F | ACCTATGAGAAGCCCACGA    |
| ELQ32319.1-R | AGCCAGTAGCAAACCGAGA    |
| ELQ36319.1-F | GCCGAAATCAGCAACAGT     |
| ELQ36319.1-R | AAAGGGGAGTAGAGGCATAG   |
| ELQ39141.1-F | TCAATATCCGAGAGCGCATG   |
| ELQ39141.1-R | GACAAAATTTGCCGTCCGTC   |
| ELQ44954.1-F | GCTACACATAACCACCAGTGC  |
| ELQ44954.1-R | TGAGAACCGTAATCGGGT     |
| ELQ43059.1-F | CACCAT CTGCCTGGGC AGC  |
| ELQ43059.1-R | GAGATGGTAC ACTGTTCAAG  |
| ELQ38751.1-F | TGAGCGTGACCACTTCAA     |
| ELQ38751.1-R | CGTGGATGTTCTCGTGTTT    |
| ELQ35717.1-F | CACGACAGCAACATACCAA    |
| ELQ35717.1-R | GCCATAAACGCCTTGTGT     |
| ELQ37205.1-F | AAAGACATTACTCCTTGCCAC  |
| ELQ37205.1-R | TTCGTTCTATGAATACCGCCTC |
| ELQ3334.1-F  | TGACGCCAAGAAGACCTCT    |
| ELQ3334.1-R  | GAATGGGTTTGACCAGCA     |
| ELQ40983.1-F | AGCGACCCACAGTATCTGAG   |
| ELQ40983.1-R | ATGCCTCCAGTTCTTCGGT    |
| ELQ38771.1-F | TGGGCAACTATGGCTACA     |
| ELQ38771.1-R | GATAAAGGAGTGGTCGGGT    |
| ELQ41744.1-F | CACGATTGAGCACCTTGA     |
| ELQ41744.1-R | AGAGTGGGTATTTCATCAGTCG |
| RT-MoPEX6-F  | GAGGAGGAAGATAGGCAAGA   |
| RT-MoPEX6-R  | TGAGATTTACCCGTCAGAGTC  |
| RT-MoPTH2-F  | TTCAACATCGTCTCCAAGG    |
| RT-MoPTH2-R  | AAGTCAAAGGAAACCCAGC    |
| RT-MoMFP1-F  | TCAAGAACATCAAGGTCCG    |
| RT-MoMFP1-R  | TCGGTATTTACGCTACAGA    |
| RT-MoICL1-F  | GATGTCGTCAAGCACCAA     |
| RT-MoICL1-R  | TGTCTATTGCGGAGTCAGC    |
| RT-MoTPS1-F  | TTCGTCGCCGAGCTCAATAG   |
| RT-MoTPS1-R  | GGCACGCAAATAGGCAGATG   |
| RT-MoTGL1-F  | CATTCAACGCCATACCAGCG   |
| RT-MoTGL1-R  | GAGGCAAACGGACCAGAGAA   |
| RT-MoSLN1-F  | ACGGGACCAAGTCATCAGT    |
| RT-MoSLN1-R  | CCAGACGACAGACGAGATAA   |

Primers used for EMSA

|                     |                         |
|---------------------|-------------------------|
| A-box-EMSA-F-Biotin | ATTACGTATGTACGTATC      |
| A-box-EMSA-R-Biotin | GATACGTACATACGTAAT      |
| A-box-EMSA-F        | ATTACGTATGTACGTATC      |
| A-box-EMSA-R        | GATACGTACATACGTAAT      |
| MoTPS1-Biotin-F     | TTAGCTGGAATAAGGCGGGCA   |
| MoTPS1-Biotin-R     | TTGTACCAAGAGATGCAAAGC   |
| MoPTH2-Biotin-F     | GAAATCTCCTATGCTCACAAG   |
| MoPTH2-Biotin-R     | CACAAAAAACAACCTTCCA     |
| MoTGL1-Biotin-F     | CGCTTATTACCCCTTTGTCG    |
| MoTGL1-Biotin-R     | CATTAAGTGC AGGGCTAGAA G |
